# Supplementary material for: A Noninvasive Assessment of Tumor Proliferation in Lung cancer Patients using Intravoxel Incoherent Motion Magnetic Resonance Imaging
Source: PubMed Central journal article supplement (PMC7738818; doi:10.7150/jca.48589), 2021-01-01
Supplement: jcav12p0190s1.pdf [file jcav12p0190s1.pdf]

Supplemental Materials

## **The Noninvasive Assessment of Ki-67 Expression in Lung cancer Patients Through Intravoxel Incoherent Motion Magnetic Resonance Imaging**

Yu Zheng<sup>1#</sup>, Wenjun Huang<sup>1#</sup>, Xuelin Zhang<sup>2</sup>, Chen Lu<sup>3</sup>, Caixia Fu<sup>4</sup>, Shihong Li<sup>1\*</sup>, Guangwu Lin<sup>1\*</sup>

<sup>1</sup>Department of Radiology, Huadong Hospital Affiliated to Fudan University, Shanghai, 200040, China

<sup>2</sup>Department of Thoracic Surgery, Huadong Hospital Affiliated to Fudan University, Shanghai, 200040, China

<sup>3</sup>Department of Pathology, Huadong Hospital Affiliated to Fudan University, Shanghai, 200040, China

<sup>4</sup>Siemens Shenzhen Magnetic Resonance Ltd., Shenzhen, Guangdong Province, 518057, China

## Supplemental figures

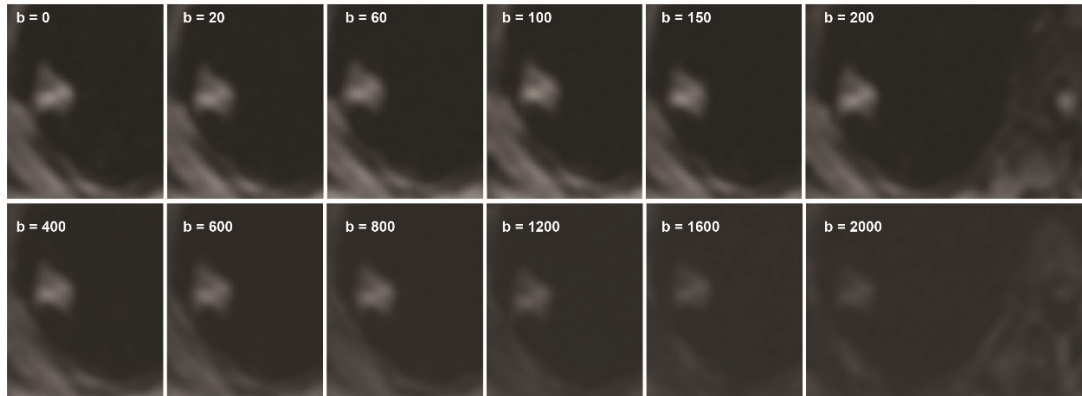

**Figure S1.** The diffusion-weighted images with multiple ascending b values for a case of non-small cell lung cancer (NSCLC). The signal intensity of the nodule was gradually attenuated.

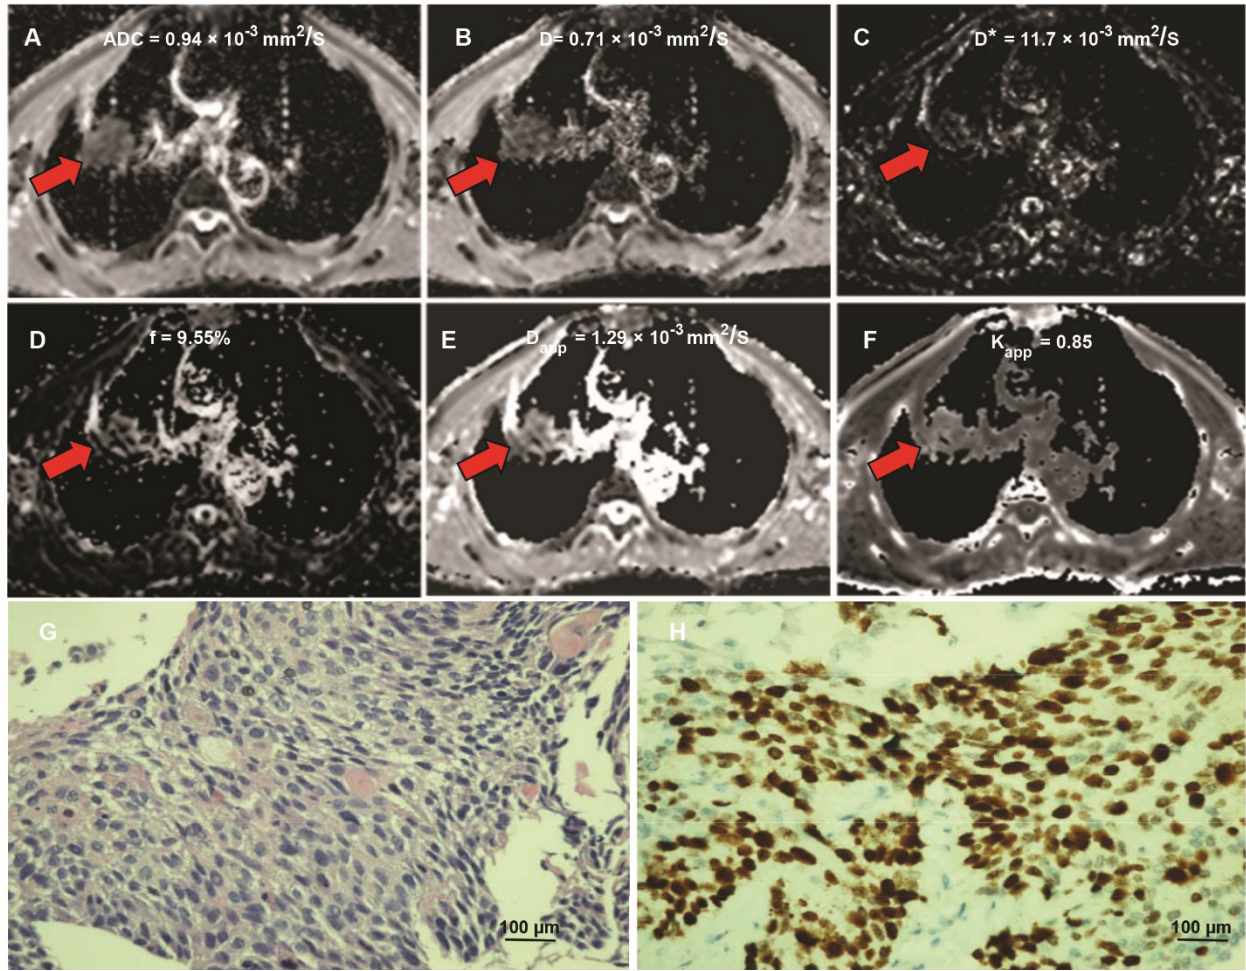

Figure S2. A 75-year-old male patient with lung squamous cell carcinoma. (A) An axial ADC map showed that a hypointense mass is located in the right pulmonary upper lobe (red arrow), with an ADC value of  $0.93 \times 10^{-3} \text{ mm}^2/\text{s}$ . (B) diffusion map demonstrating reduced D value ( $0.72 \times 10^{-3} \text{ mm}^2/\text{s}$ ). (C) pseudodiffusion coefficient ( $D^*$ ) map demonstrating  $D^*$  value ( $11.73 \times 10^{-3} \text{ mm}^2/\text{s}$ ). (D). perfusion fraction (f) map showing f value of 9.56%. (E) diffusion map ( $D_{\text{app}}$ ) showing  $D_{\text{app}}$  value of  $1.28 \times 10^{-3} \text{ mm}^2/\text{s}$ , and (F) kurtosis map showing the  $K_{\text{app}}$  value of 0.85. (G) Haematoxylin-eosin staining confirms the mass as a squamous cell carcinoma (magnification,  $\times 400$ ,  $100 \mu\text{m}$ ). (H) Ki-67 immunohistochemical labelling shows that approximately 80% of cells are positive for nuclear staining (magnification,  $\times 400$ ,  $100 \mu\text{m}$ ).

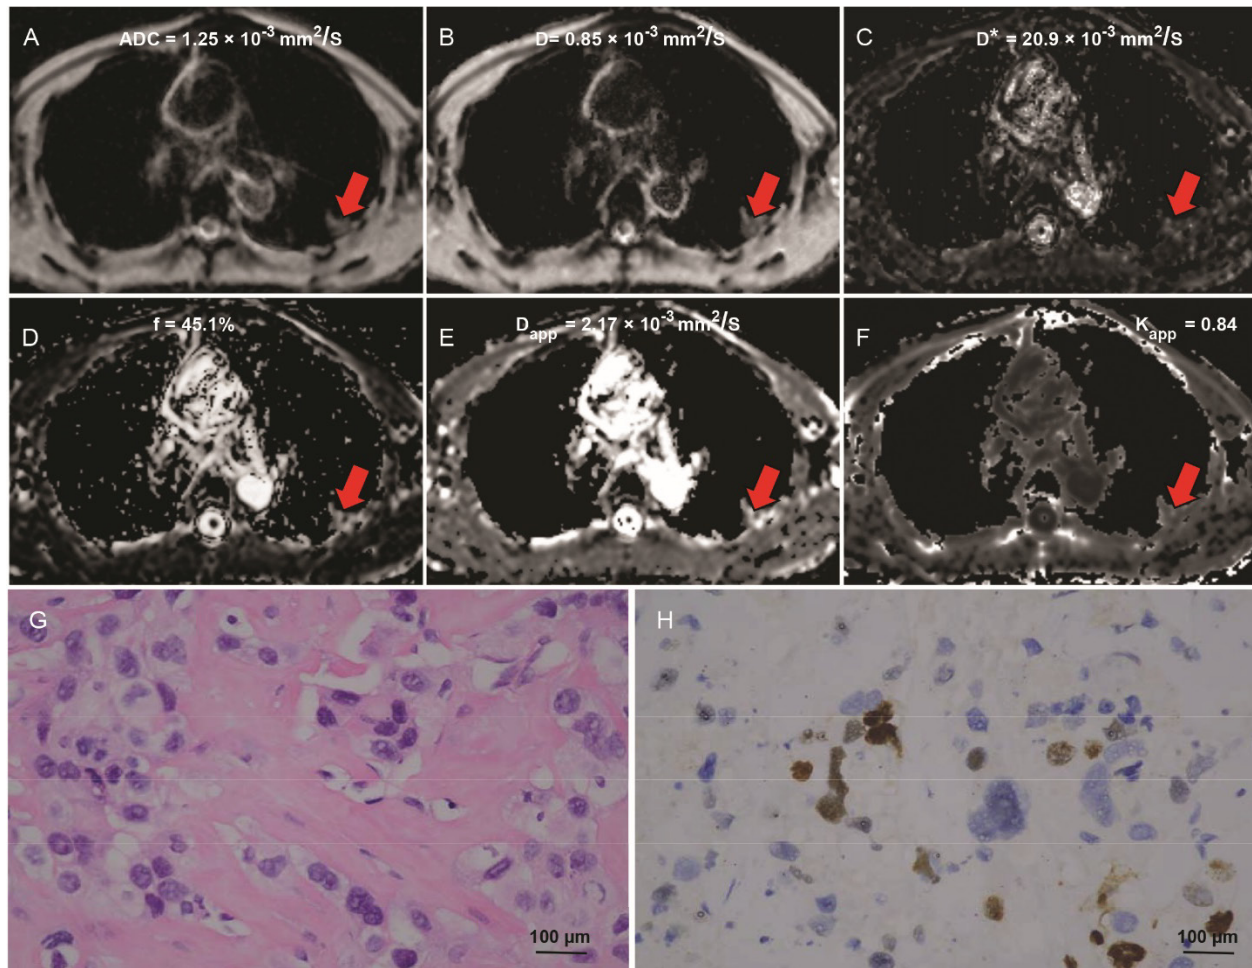

Figure S3. A 72-year-old male patient with large cell carcinoma. **(A)** An axial ADC map showed a hypointense pulmonary nodule is located in the left pulmonary upper lobe (red arrow), with an ADC value of  $1.25 \times 10^{-3} \text{ mm}^2/\text{s}$ . **(B)** diffusion map (D) demonstrating reduced D value ( $0.85 \times 10^{-3} \text{ mm}^2/\text{s}$ ). **(C)** pseudodiffusion coefficient ( $D^*$ ) map demonstrating  $D^*$  value ( $20.90 \times 10^{-3} \text{ mm}^2/\text{s}$ ). **(D)**. perfusion fraction (f) map showing the f value of 45.1%. **(E)** diffusion map ( $D_{app}$ ) showing the  $D_{app}$  value ( $2.17 \times 10^{-3} \text{ mm}^2/\text{s}$ ), and **(F)** kurtosis map showing the  $K_{app}$  value of 0.84. **(G)** Haematoxylin-eosin staining confirms the nodule as a large cell carcinoma (magnification,  $\times 400$ ,  $100 \mu\text{m}$ ). **(H)** Ki-67 immunohistochemical labelling shows that approximately 40% of cells are positive for nuclear staining (magnification,  $\times 400$ ,  $100 \mu\text{m}$ )

**Table S1** MRI sequence parameters

| Sequence             | T2WI-Haste | T2WI-FS<br>-triggered | T1-VIBE    | Conventional<br>DWI | IVIM-DKI   |
|----------------------|------------|-----------------------|------------|---------------------|------------|
| Plane                | transverse | transverse            | transverse | transverse          | transverse |
| TR/TE, ms            | 1400/90    | 2500/80               | 3.97/1.23  | 3000/41             | 4000/54    |
| Slice thickness (mm) | 5          | 5                     | 3          | 5                   | 5          |
| Flip Angle           | 160        | 101                   | 9          |                     |            |
| Intersection gap     | 30%        | 20%                   | 20%        | 20%                 | 20%        |
| FOV (mm)             | 400        | 400                   | 440        | 380                 | 380        |
| Matrix               | 320 × 320  | 384 × 384             | 320 × 195  | 134 × 100           | 128 × 128  |
| TA (second)          | 40         | 155                   | 15         | 127                 | 504        |

Abbreviations: MRI: Magnetic resonance imaging; T2WI: T2 weighted image; T2WI-FS: T2 weighted image-fat-suppressed; T1-VIBE: T1-volumetric interpolated breath-hold examination; DWI: diffusion weighted imaging; IVIM-DKI: intravoxel incoherent motion-diffusion kurtosis imaging; TR/TE: repetition time/echo time; FOV: Field-of-view; TA:

**Table S2** The correlations between MRI parameters and Ki-67 LI

| Parameters                                  | Coefficient r | <i>P</i> |
|---------------------------------------------|---------------|----------|
| ADC ( $\times 10^{-3}$ mm <sup>2</sup> /s)  | -0.55         | 0.000    |
| D ( $\times 10^{-3}$ mm <sup>2</sup> /s)    | -0.76         | 0.000    |
| D* ( $\times 10^{-3}$ mm <sup>2</sup> /s)   | -0.26         | 0.069    |
| f (%)                                       | -0.22         | 0.121    |
| Kapp                                        | 0.41          | 0.001    |
| Dapp ( $\times 10^{-3}$ mm <sup>2</sup> /s) | -0.22         | 0.116    |

Note: Spearman's correlation was performed. MRI: Magnetic resonance imaging; ADC: apparent diffusion coefficient; D: true diffusion coefficient, D\* value: the perfusion-related pseudodiffusion coefficient; f: perfusion fraction; Kapp: diffusion kurtosis; Dapp: diffusivity.

**Table S3.** Comparison of MRI values between NSCLC and SCLC

| Parameters                                 | NSCLC (n = 42)  | SCLC (n = 9)    | <i>P</i> |
|--------------------------------------------|-----------------|-----------------|----------|
| ADC ( $\times 10^{-3}$ mm <sup>2</sup> /s) | 1.24 $\pm$ 0.28 | 1.00 $\pm$ 0.25 | 0.025    |
| D ( $\times 10^{-3}$ mm <sup>2</sup> /s)   | 1.07 $\pm$ 0.29 | 0.79 $\pm$ 0.16 | 0.003    |
| D* ( $\times 10^{-3}$ mm <sup>2</sup> /s)  | 20.3 $\pm$ 10.9 | 13.8 $\pm$ 5.73 | 0.103    |
| f (%)                                      | 30.2 $\pm$ 16.1 | 19.4 $\pm$ 12.1 | 0.079    |
| Kapp                                       | 0.69 $\pm$ 0.14 | 0.90 $\pm$ 0.29 | 0.048    |
| Dapp ( $\times 10^{-3}$ mm/s)              | 1.91 $\pm$ 0.59 | 1.32 $\pm$ 0.51 | 0.005    |

MRI: Magnetic resonance imaging; NSCLC: Non-small cell lung cancer; SCLC: small cell lung cancer; ADC: apparent diffusion coefficient; D: true diffusion coefficient, D\* value: the perfusion-related pseudodiffusion coefficient; f: perfusion fraction; Kapp: diffusion kurtosis; Dapp: diffusivity;

**Table S4** ROC analysis for ADC, D, Dapp and Kapp values in differentiating SCLC from NSCLC

| Parameters                                  | Cut-off value | Sensitivity (%) | Specificity (%) | AUC (95% CI)       | Youden index | F1 score | <i>P</i> |
|---------------------------------------------|---------------|-----------------|-----------------|--------------------|--------------|----------|----------|
| ADC ( $\times 10^{-3}$ mm <sup>2</sup> /s)  | 0.84          | 95.2            | 44.4            | 0.73 (0.59 - 0.85) | 0.39         | 0.69     | 0.025    |
| D ( $\times 10^{-3}$ mm <sup>2</sup> /s)    | 0.85          | 83.3            | 77.8            | 0.82 (0.68 - 0.90) | 0.72         | 0.81     | 0.003    |
| Dapp ( $\times 10^{-3}$ mm <sup>2</sup> /s) | 1.45          | 76.2            | 77.8            | 0.68 (0.53 - 0.81) | 0.54         | 0.65     | 0.005    |
| Kapp                                        | 0.87          | 66.7            | 92.9            | 0.71 (0.55 - 0.82) | 0.60         | 0.68     | 0.048    |

ROC: receiver operating characteristic; SCLC: small cell lung cancer; NSCLC: non-small cell lung cancer; ADC: apparent diffusion coefficient; D: true diffusion coefficient, D\* value: the perfusion-related pseudodiffusion coefficient; f: perfusion fraction; Kapp: diffusion kurtosis; Dapp: diffusivity; AUROC: Area under ROC curve; CI: confidence interval.



**Table S5** Raw data for receiver operating characteristic (ROC) curve analysis

| Diagnosis | ADC  | D    | D2    | Kapp |
|-----------|------|------|-------|------|
| 0         | 1.16 | 0.88 | 18.75 | 0.61 |
| 0         | 1.85 | 1.65 | 24.73 | 0.7  |
| 0         | 1.21 | 0.82 | 11.8  | 0.72 |
| 0         | 1.02 | 0.99 | 18.12 | 0.51 |
| 0         | 1.08 | 1.01 | 21.78 | 0.83 |
| 0         | 1.27 | 1.17 | 11.44 | 0.73 |
| 0         | 1.13 | 1.22 | 14.63 | 0.66 |
| 0         | 1.14 | 0.94 | 32.97 | 0.8  |
| 0         | 1.19 | 0.96 | 18.1  | 0.94 |
| 0         | 1.26 | 1.22 | 10.24 | 0.89 |
| 0         | 1.61 | 1.49 | 19.8  | 0.43 |
| 0         | 1.62 | 1.43 | 21.41 | 0.74 |
| 0         | 1.25 | 0.85 | 20.9  | 0.84 |
| 0         | 1.19 | 0.91 | 27.83 | 0.61 |
| 0         | 1.9  | 1.97 | 58.05 | 0.52 |
| 0         | 1.45 | 1.01 | 7.32  | 0.69 |
| 0         | 0.96 | 0.92 | 22.2  | 0.53 |
| 0         | 0.84 | 0.6  | 35.23 | 0.61 |
| 0         | 0.93 | 0.92 | 31.13 | 0.8  |
| 0         | 1.18 | 0.63 | 12.31 | 0.61 |
| 0         | 0.94 | 0.71 | 11.73 | 0.85 |
| 0         | 1.1  | 1.07 | 19.96 | 0.79 |
| 0         | 1.22 | 1.14 | 13.79 | 0.67 |
| 0         | 1.19 | 1.14 | 38.14 | 0.76 |
| 0         | 0.81 | 0.72 | 10.8  | 0.78 |
| 0         | 1.26 | 1.19 | 19.15 | 0.82 |
| 0         | 0.86 | 0.85 | 5.45  | 0.91 |
| 0         | 0.93 | 0.84 | 12.3  | 0.85 |
| 0         | 1.11 | 0.96 | 33.79 | 0.64 |
| 0         | 1.34 | 0.9  | 32.54 | 0.56 |
| 0         | 1.03 | 1    | 31.9  | 0.74 |
| 0         | 1.64 | 0.86 | 7.61  | 0.7  |
| 0         | 1.51 | 1.18 | 26.47 | 0.77 |
| 0         | 1.16 | 0.8  | 7.31  | 0.81 |
| 0         | 1.03 | 1.07 | 18.7  | 0.55 |
| 0         | 0.81 | 0.71 | 25.26 | 0.73 |
| 0         | 0.96 | 0.91 | 17.4  | 0.79 |
| 0         | 1.39 | 1.11 | 15.4  | 0.8  |
| 0         | 0.9  | 0.67 | 12.39 | 0.89 |
| 0         | 1.01 | 0.81 | 9.23  | 0.64 |
| 0         | 1.42 | 1.22 | 36.44 | 0.3  |
| 1         | 0.67 | 0.55 | 12.21 | 1.2  |

|   |      |      |       |      |
|---|------|------|-------|------|
| 1 | 0.98 | 0.84 | 20.62 | 0.61 |
| 1 | 1.41 | 1.12 | 10.36 | 1.19 |
| 1 | 0.83 | 0.7  | 16.03 | 1.14 |
| 1 | 0.76 | 0.73 | 16.11 | 0.98 |
| 1 | 0.99 | 0.93 | 15.48 | 1.1  |
| 1 | 1.27 | 0.79 | 8.18  | 0.47 |
| 1 | 1.07 | 0.72 | 3.99  | 0.53 |
| 1 | 0.79 | 0.76 | 21.62 | 0.87 |

---

Note: 0: for non-small cell lung cancer (NSCLC), and 1: for small cell lung cancer (SCLC)
